# Supplementary material for: The Tumor Suppressor SOCS1 Diminishes Tolerance to Oxidative Stress in Hepatocellular Carcinoma
Source: MDPI journal article supplement (doi:10.3390/cancers16020292), 2024-01-10

# The tumor suppressor SOCS1 diminishes tolerance to oxidative stress in hepatocellular carcinoma

Akhil Shukla et al.,

Supplementary Figures S1 to S6

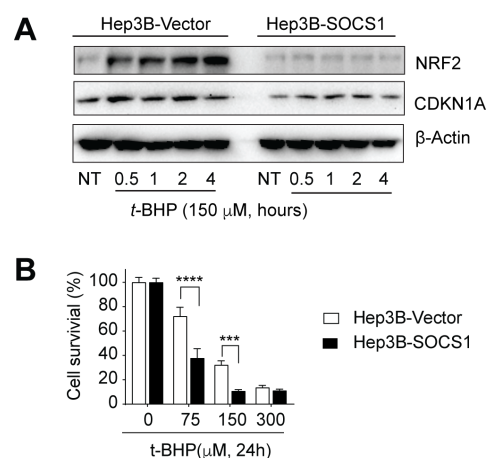

**Supplementary Figure S1. SOCS1 diminishes NRF2 induction following oxidative stress in human Hep3B cells.** (A) Hep3B-vector and Hep3B-SOCS1 cells were treated with *t*-BHP (150 μM) and evaluated for the expression of p21 and NRF2 proteins by western blot. Representative data from two independent experiments are shown. (B) Hep3B-vector and Hep3B-SOCS1 cells were treated with *t*-BHP (150 μM). Cell viability was assessed after 24h. Cumulative data from three separate experiments are shown as Mean ± SE. ANOVA with Tukey's multiple comparison test. *p* values: \* <0.05, \*\* <0.01, \*\*\* <0.001, \*\*\*\* <0.001.

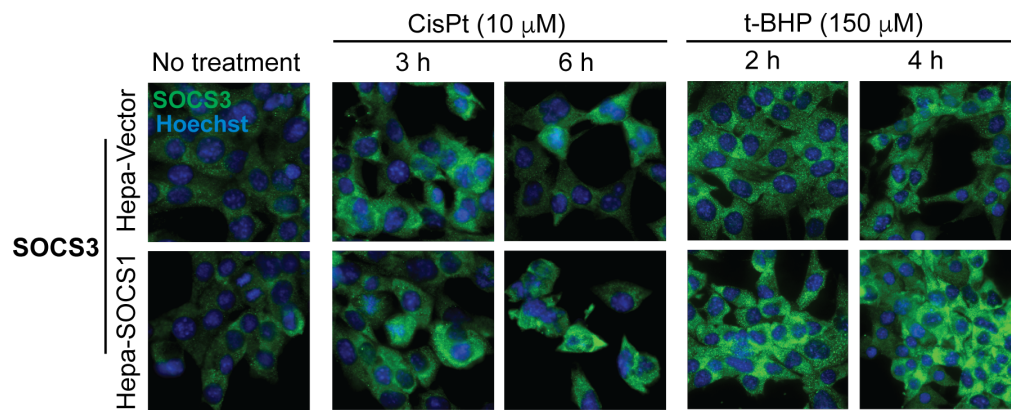

**Supplementary Figure S2. SOCS1 does not impact SOCS3 protein expression induced by oxidative stress.** Hepa-Vector and Hepa-SOCS1 cells grown on glass cover slips were treated with cisplatin (10  $\mu$ M) or *t*-BHP (150  $\mu$ M) for the indicated periods of time. Expression of the SOCS3 protein was evaluated by immunofluorescence microscopy. Representative data from two experiments are shown.

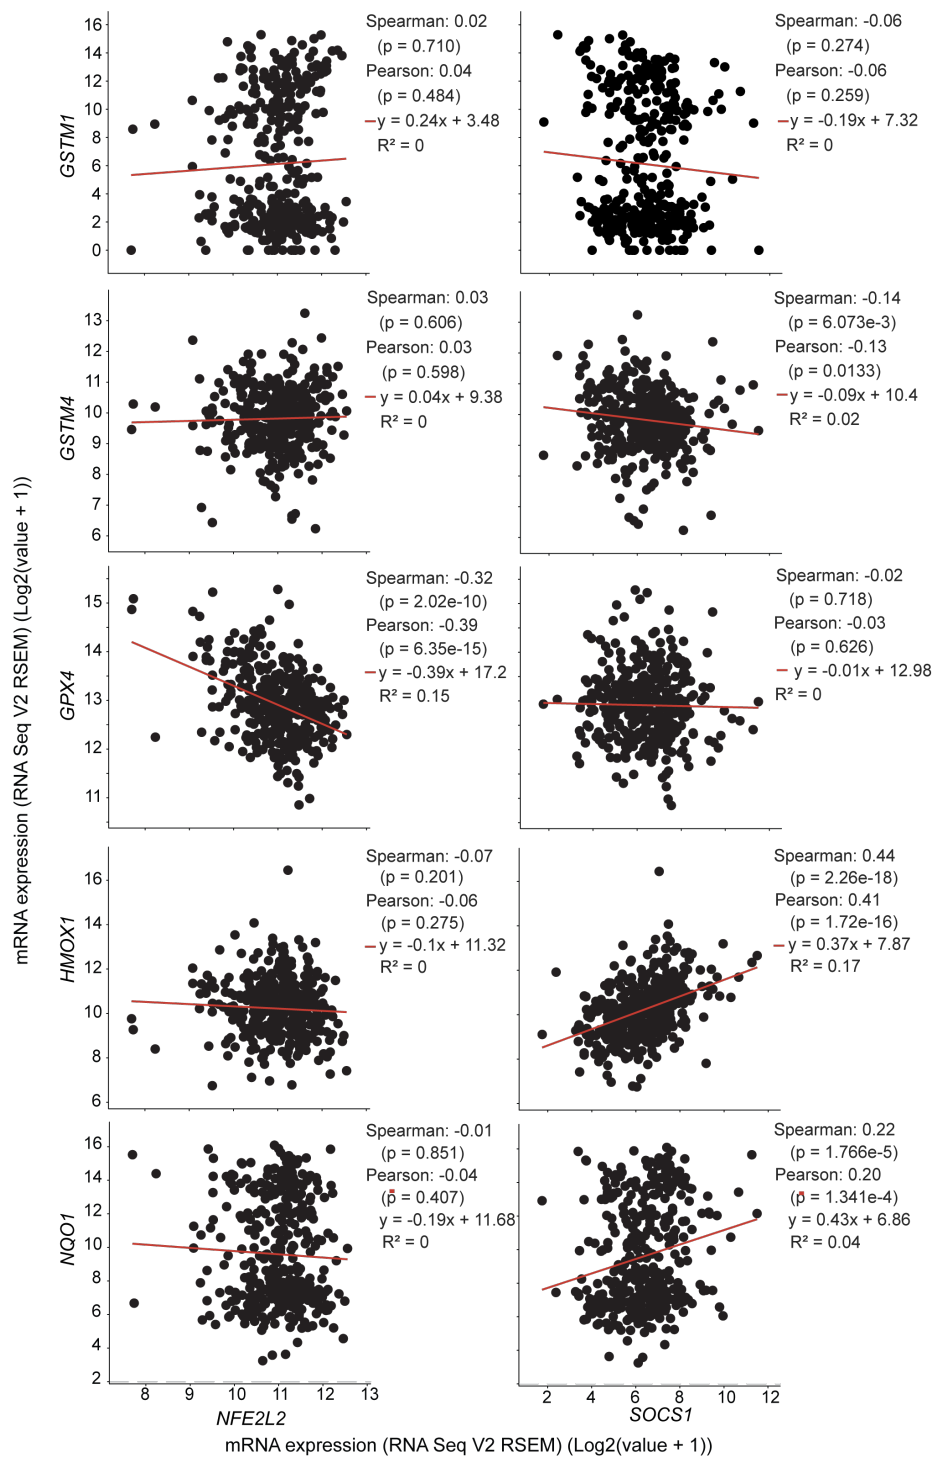

**Supplementary Figure S3.** Correlation between the expression of NRF2 target genes and *NFE2L2* and *SOCS1* expression in the TCGA-LIHC transcriptomic data.

# Proteins of the mitochondrial electron transport chain complex

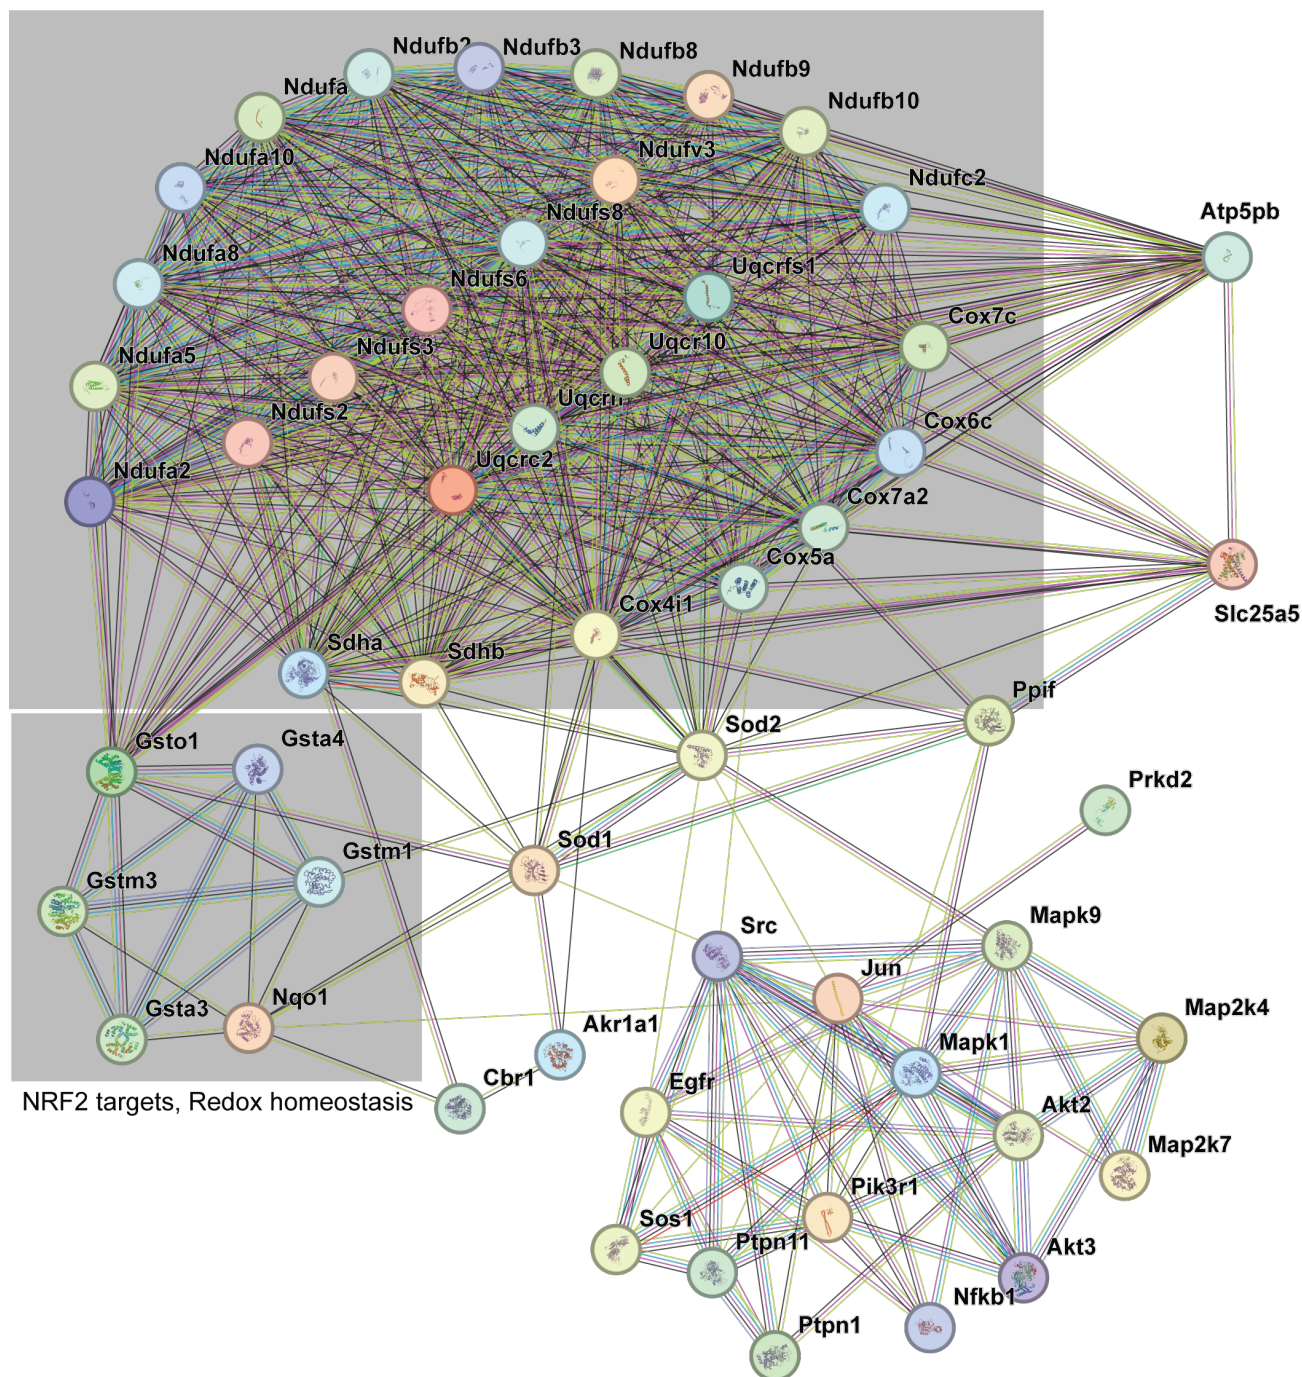

**Supplementary Figure S4A.** STRING analysis of proteins modulated by SOCS1 in the ‘chemical carcinogenesis- reactive oxygen species’ pathway. All proteins of the ‘chemical carcinogenesis- reactive oxygen species’ pathway modulated in untreated, cisplatin-treated and *t*-BHP-treated Hepa-SOCS1 cells compared to Hepa-Vector controls were analysed for protein interaction network using the STRING database (<https://string-db.org>; accessed in November 2023). Proteins that form the mitochondrial electron transport chain and the NRF2-induced proteins and those implicated in Redox homeostasis are indicated within grey boxes.





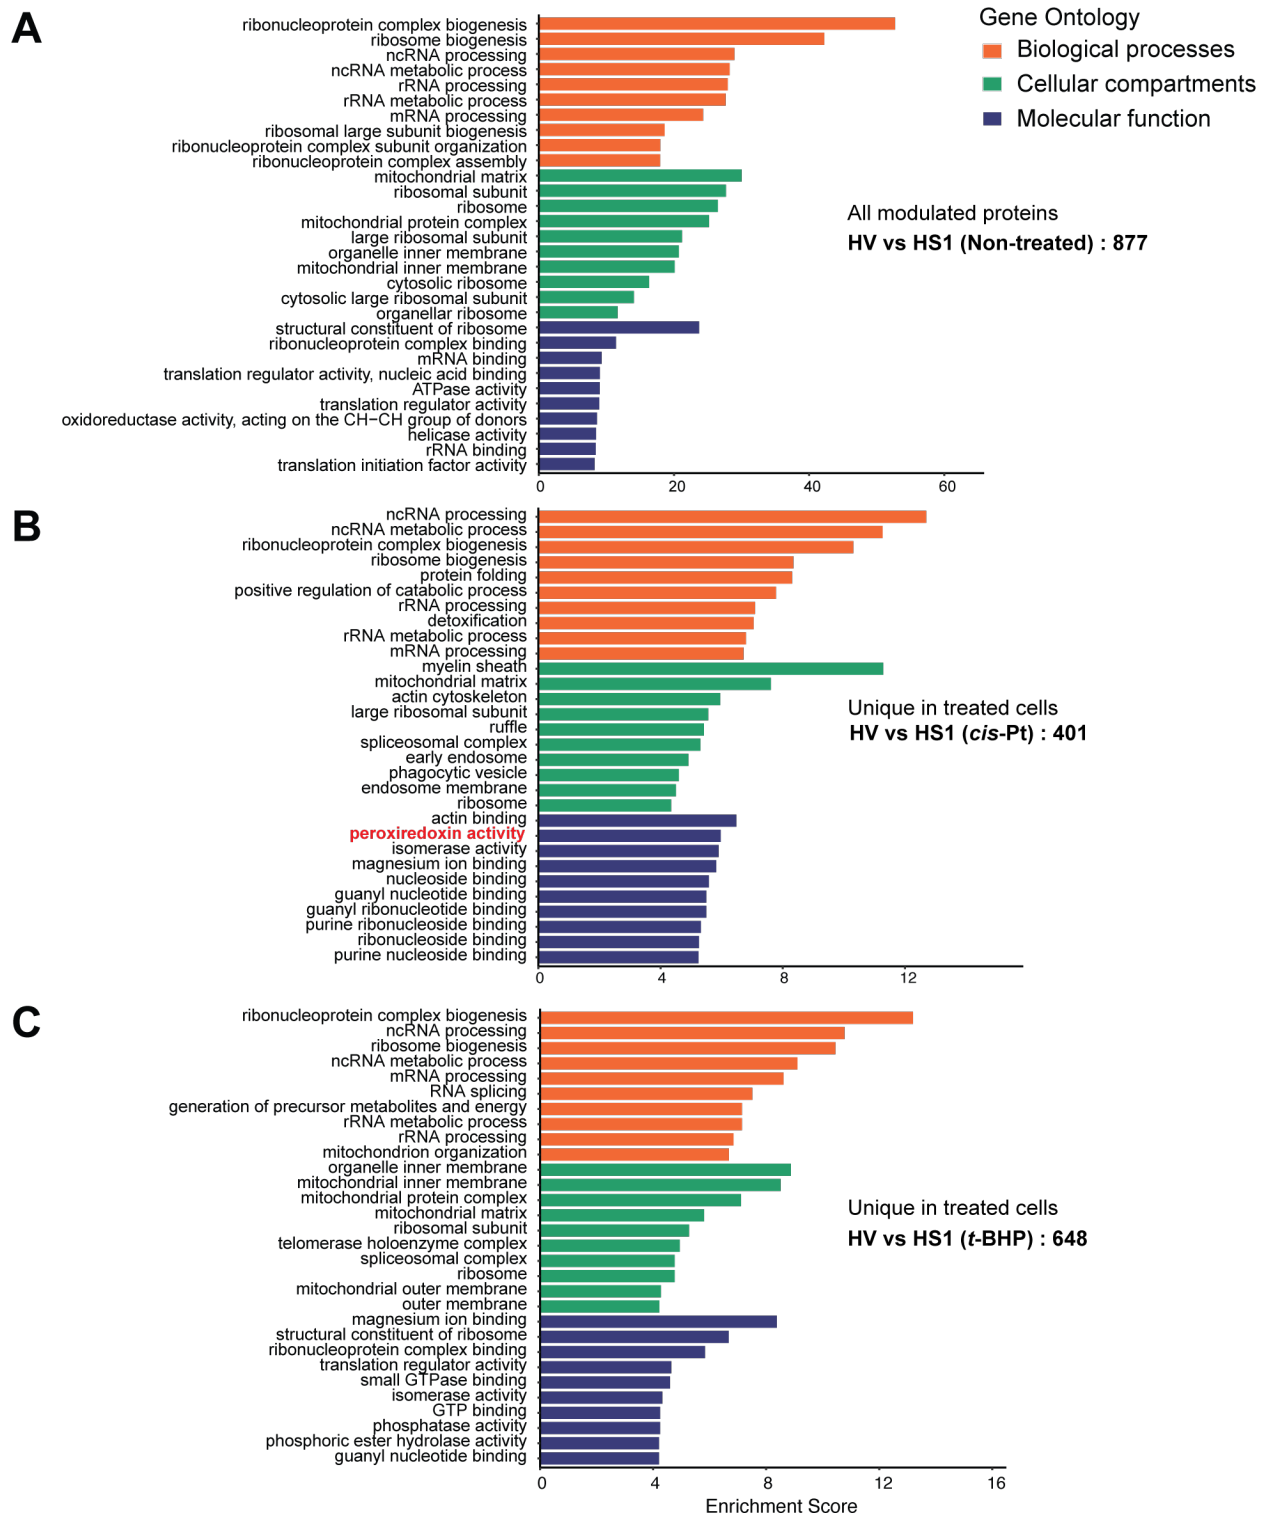

**Supplementary Figure S5.** Gene ontology analysis of all proteins modulated by SOCS1 in untreated Hepa-SOCS1 cells (A), and proteins uniquely modulated in cisplatin-treated (B) and *t*-BHP treated (C) compared to Hepa-Vector controls. Total number of proteins included in these analyses are indicated.

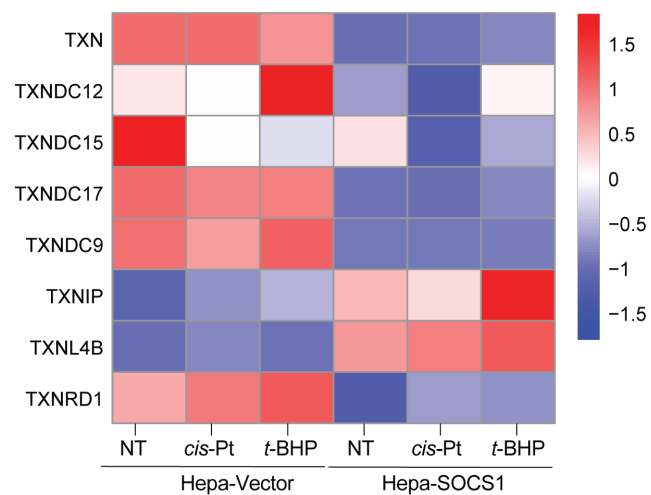

**Supplementary Figure S6.** Expression of thioredoxin and related proteins in untreated, cisplatin-treated and *t*-BHP treated Hepa-Vector and Hepa-SOCS1 cells. TXNDC12, thioredoxin domain contain protein 12; TXNIP, thioredoxin interacting protein; TXNL, thioredoxin-like.

Uncropped western blots: Figure S1A

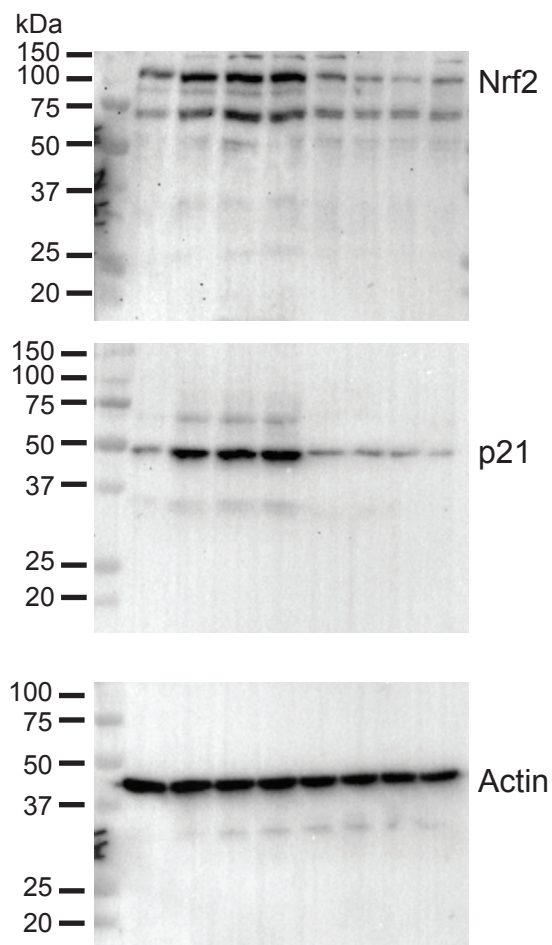



Uncropped western blots: FigureS1B

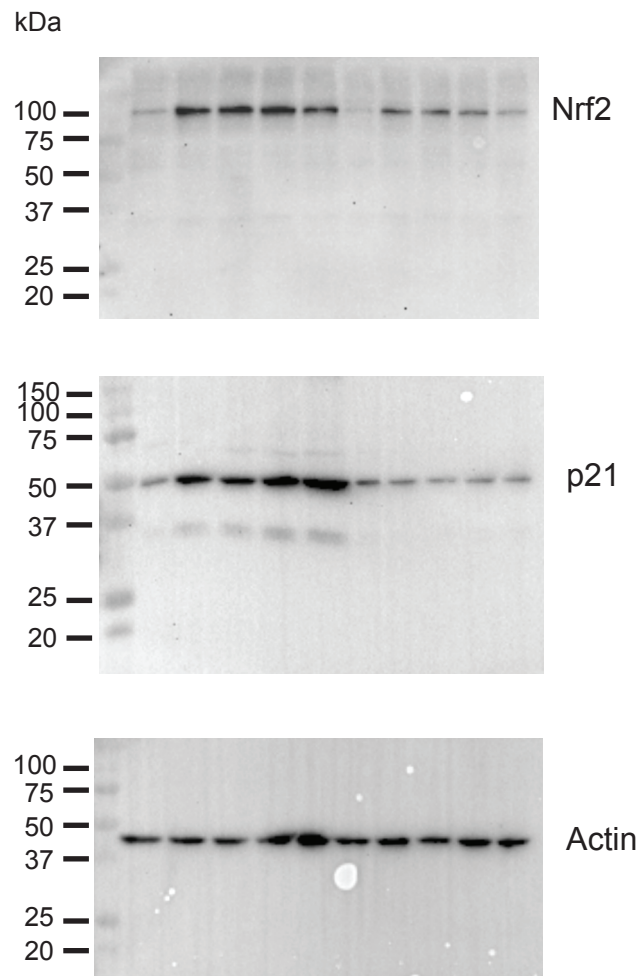

Uncropped western blots: Figure S1A

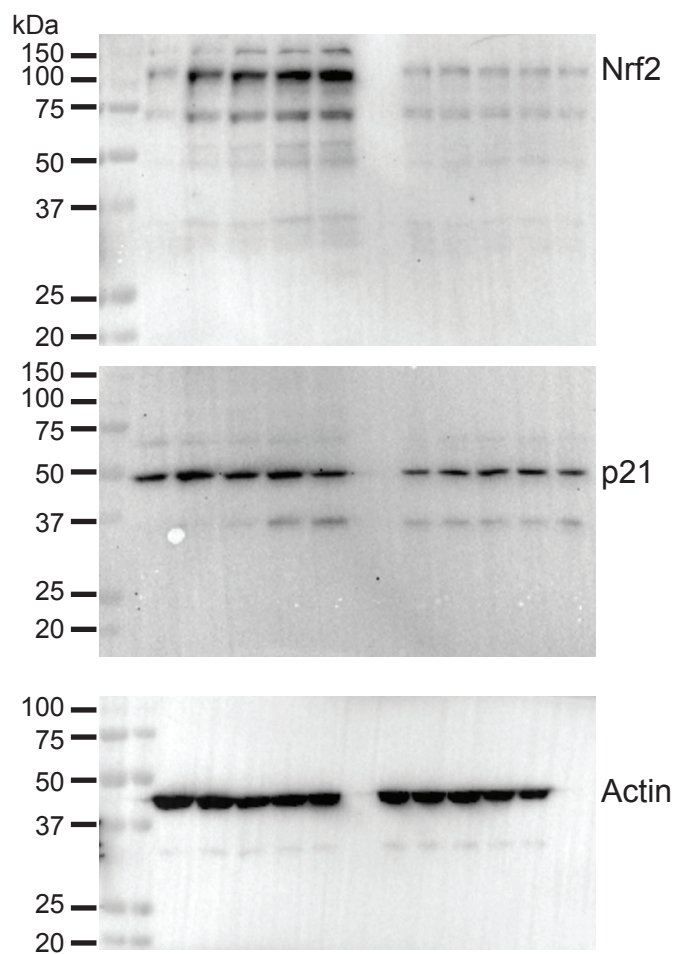

Supplement: s1 [file s1]
